# Supplementary material for: Probabilistic Prediction Models and Influence Factors of Indoor Formaldehyde and VOC Levels in Newly Renovated Houses
Source: MDPI journal article supplement (doi:10.3390/atmos13050675), 2022-04-23
Supplement: s1 [file s1]

*Supplementary Material for*

# **Probabilistic Prediction Models and Influence Factors of Indoor Formaldehyde and VOC Levels in Newly Renovated Houses**

**Wu-Ting Lin <sup>1,2</sup>, Ru-Yin Tsai <sup>3</sup>, Hsiu-Ling Chen <sup>4</sup>, Yaw-Shyan Tsay <sup>3,\*</sup> and Ching-Chang Lee <sup>1,5,\*</sup>**

<sup>1</sup> Department of Environmental and Occupational Health, College of Medicine, National Cheng Kung University, Tainan 704, Taiwan; wtlin@abri.gov.tw

<sup>2</sup> Architecture and Building Research Institute, Ministry of the Interior, New Taipei 704, Taiwan

<sup>3</sup> Department of Architecture, National Cheng Kung University, Tainan 704, Taiwan; n77051090@mail.ncku.edu.tw (R.-Y.T.); tsayys@mail.ncku.edu.tw (Y.-S.T.)

<sup>4</sup> Department of Food Safety/Hygiene and Risk Management, Medical College, National Cheng Kung University, Tainan 704, Taiwan; hsiulinchen@mail.ncku.edu.tw

<sup>5</sup> Research Center of Environmental Trace Toxic Substances, National Cheng Kung University, Tainan 704, Taiwan

\* Correspondence: clee@mail.ncku.edu.tw; Tel.: +886-6-275-7575; Fax: +886-6-274-3748

+ Equal contribution by the corresponding author

## **Description of contents:**

Table S1. Exposure parameters of the selected age groups in health risk assessment

Table S2. Toxic parameters of the selected age groups in health risk assessment

Table S3. The equation of indoor prediction models for the concentrations of formaldehyde and specific VOCs based on the multiple linear regressions

Table S4. Exposure dose of indoor formaldehyde and individual VOCs in the selected age groups

**Table S1.** Exposure parameters of the selected age groups in health risk assessment.

| Description            | Unit                | Value      |            |             |             | Source                 |
|------------------------|---------------------|------------|------------|-------------|-------------|------------------------|
|                        |                     | Man        | Female     | 6–12 Boy    | 6–12 Girl   |                        |
| body weight, BW        | kg                  | 70.6 ± 9.5 | 58.4 ± 8.8 | 34.7 ± 15.2 | 33.2 ± 12.6 | Taiwan HPA 2008 [2]    |
| inhalation rate, IR    | m <sup>3</sup> /day | 18.3       | 12.3       | 10.6        | 9.84        | Taiwan HPA 2008 [2]    |
| exposure time, ET      | h/day               | 12.8       | 13.7       | 12.8        | 13.7        | Taiwan HPA 2008 [2]    |
| exposure frequency, EF | days/y              | 340        | 340        | 340         | 340         | Taiwan HPA 2008 [2]    |
| exposure duration, ED  | y                   | 5          | 5          | 5           | 5           | Liu and Zhang 2013 [1] |
| average lifetime, AT   | y                   | 78.1       | 84.7       | 78.1        | 84.7        | Taiwan MOI 2020 [3]    |
| Open rate of window    | %                   | 50         | 50         | 50          | 50          | Assumed by this study  |

**Table S2.** Toxic parameters of the selected age groups in health risk assessment.

| Compound      | RfD value<br>(mg/kg<br>bw/day) | Critical Effect                                  | Oral or Inhalation<br>Slope Factor<br>(mg/kg bw/day) <sup>-1</sup>   | Uncertainty<br>Factor | Critical Effect                      | Source                      |
|---------------|--------------------------------|--------------------------------------------------|----------------------------------------------------------------------|-----------------------|--------------------------------------|-----------------------------|
| Benzene       | 0.004                          | Decreased lymphocyte count                       | 1.5 × 10 <sup>-2</sup> (oral)<br>1.0 × 10 <sup>-1</sup> (inhalation) | 300                   | Hematologic Leukemia                 | IRIS, USEPA<br>OEHHA, USEPA |
| Toluene       | 0.08                           | Increased kidney weight                          |                                                                      | 3000                  |                                      | IRIS, USEPA                 |
| Ethyl Benzene | 0.1                            | Liver and kidney toxicity                        | 1.1 × 10 <sup>-2</sup> (oral)<br>8.7 × 10 <sup>-3</sup> (inhalation) | 300                   | Renal tubule adenoma<br>or carcinoma | IRIS, USEPA<br>OEHHA, USEPA |
| m-Xylenes     | 0.2                            | Decreased body weight,<br>increased mortality    |                                                                      | 300                   |                                      | IRIS, USEPA                 |
| p-Xylenes     | 0.2                            | Decreased body weight,<br>increased mortality    |                                                                      | 300                   |                                      | IRIS, USEPA                 |
| o-Xylenes     | 0.2                            | Decreased body weight,<br>increased mortality    |                                                                      | 300                   |                                      | IRIS, USEPA                 |
| Styrene       | 0.2                            | Red blood cell and liver<br>effects, CNS effects |                                                                      | 30                    |                                      | IRIS, USEPA                 |
| Formaldehyde  | 0.2                            | Reduced weight gain,<br>histopathology in rats   | 2.1 × 10 <sup>-2</sup> (inhalation)                                  | 100                   | Squamous cell<br>carcinoma           | IRIS, USEPA<br>OEHHA, USEPA |

**Table S3.** The equation of indoor prediction models for the concentrations of formaldehyde and specific VOCs based on the multiple linear regressions.

| Indoor Pollutants | Equation of Indoor Concentration Prediction Models                                                                                                                                               |
|-------------------|--------------------------------------------------------------------------------------------------------------------------------------------------------------------------------------------------|
| Formaldehyde      | $= -0.003 \times RS + 0.015 \times T - 0.001 \times RH + 0.140 \times CPM + 0.081 \times LHP + 0.190 \times VM + 0.071 \times SF + 0.001 \times CP + 0.283 \times WF - 0.114 \times OW - 0.151$  |
| Benzene           | $= -0.001 \times RS + 0.003 \times T + 0.001 \times RH + 0.010 \times CPM - 0.013 \times LHP + 0.010 \times VM + 0.002 \times SF + 0.012 \times CP + 0.008 \times WF - 0.009 \times OW - 0.058$  |
| Toluene           | $= -0.010 \times RS + 0.273 \times T + 0.019 \times RH + 3.207 \times CPM + 1.761 \times LHP + 1.569 \times VM + 1.860 \times SF + 0.649 \times CP + 0.447 \times WF - 0.515 \times OW - 8.334$  |
| Ethyl Benzene     | $= -0.001 \times RS + 0.002 \times T + 0.001 \times RH + 0.025 \times CPM + 0.004 \times LHP + 0.002 \times VM + 0.017 \times SF + 0.001 \times CP + 0.030 \times WF - 0.010 \times OW - 0.046$  |
| m-Xylene          | $= -0.001 \times RS + 0.001 \times T + 0.001 \times RH + 0.014 \times CPM + 0.005 \times LHP + 0.001 \times VM + 0.0014 \times SF + 0.001 \times CP + 0.022 \times WF - 0.008 \times OW - 0.030$ |
| p-Xylene          | $= -0.001 \times RS + 0.002 \times T + 0.001 \times RH + 0.031 \times CPM + 0.006 \times LHP + 0.004 \times VM + 0.002 \times SF + 0.001 \times CP + 0.051 \times WF - 0.017 \times OW - 0.054$  |
| o-Xylene          | $= -0.001 \times RS + 0.002 \times T + 0.001 \times RH + 0.027 \times CPM + 0.013 \times LHP + 0.023 \times VM + 0.008 \times SF + 0.008 \times CP + 0.064 \times WF - 0.017 \times OW - 0.045$  |
| Styrene           | $= -0.001 \times RS + 0.014 \times T - 0.006 \times RH + 0.140 \times CPM + 0.140 \times LHP + 0.050 \times VM + 0.181 \times SF + 0.034 \times CP + 0.630 \times WF - 0.132 \times OW - 0.012$  |

RS: Room size (m<sup>2</sup>); T: Indoor temperature (°C); RH: Indoor RH (%); CPM: Cold paint multi-layer wooden materials; LHP: Laminate hard plastic multi-layer materials; VM: Veneer multi-layer wooden materials; SF: Multi-layer materials for system furniture; CP: Cement paint; WF: Wooden floor; OW: Open window (%).

**Table S4.** Exposure dose of indoor formaldehyde and individual VOCs in the selected age groups.

| Age groups/Compound       | Average Exposure Dose Calculated by Equation | Exposure Dose Estimated by Monte Carlo Simulation |                       |                       |
|---------------------------|----------------------------------------------|---------------------------------------------------|-----------------------|-----------------------|
|                           | Mean                                         | MCS mean                                          | MCS P50               | MCS P95               |
| Adult (19-65 years old)   |                                              |                                                   |                       |                       |
| Male                      |                                              |                                                   |                       |                       |
| Formaldehyde              | $3.64 \times 10^{-6}$                        | $3.62 \times 10^{-6}$                             | $2.47 \times 10^{-6}$ | $1.09 \times 10^{-5}$ |
| VOCs                      |                                              |                                                   |                       |                       |
| Benzene                   | $3.54 \times 10^{-4}$                        | $3.51 \times 10^{-4}$                             | $2.50 \times 10^{-4}$ | $1.00 \times 10^{-3}$ |
| Toluene                   | $2.15 \times 10^{-2}$                        | $2.13 \times 10^{-2}$                             | $1.45 \times 10^{-2}$ | $6.50 \times 10^{-2}$ |
| Ethyl Benzene             | $1.84 \times 10^{-4}$                        | $1.84 \times 10^{-4}$                             | $1.37 \times 10^{-4}$ | $4.85 \times 10^{-4}$ |
| m-Xylene                  | $1.58 \times 10^{-4}$                        | $1.57 \times 10^{-4}$                             | $1.18 \times 10^{-4}$ | $4.05 \times 10^{-4}$ |
| p-Xylene                  | $3.37 \times 10^{-4}$                        | $3.35 \times 10^{-4}$                             | $2.39 \times 10^{-4}$ | $9.54 \times 10^{-4}$ |
| o-Xylene                  | $2.95 \times 10^{-4}$                        | $2.94 \times 10^{-4}$                             | $2.11 \times 10^{-4}$ | $8.22 \times 10^{-4}$ |
| Styrene                   | $1.95 \times 10^{-3}$                        | $1.93 \times 10^{-3}$                             | $1.32 \times 10^{-3}$ | $5.87 \times 10^{-3}$ |
| Female                    |                                              |                                                   |                       |                       |
| Formaldehyde              | $3.16 \times 10^{-6}$                        | $3.14 \times 10^{-6}$                             | $2.15 \times 10^{-6}$ | $9.52 \times 10^{-6}$ |
| VOCs                      |                                              |                                                   |                       |                       |
| Benzene                   | $3.07 \times 10^{-4}$                        | $3.06 \times 10^{-4}$                             | $2.17 \times 10^{-4}$ | $8.75 \times 10^{-4}$ |
| Toluene                   | $1.86 \times 10^{-2}$                        | $1.85 \times 10^{-2}$                             | $1.25 \times 10^{-2}$ | $5.64 \times 10^{-2}$ |
| Ethyl Benzene             | $1.60 \times 10^{-4}$                        | $1.60 \times 10^{-4}$                             | $1.19 \times 10^{-4}$ | $4.25 \times 10^{-4}$ |
| m-Xylene                  | $1.37 \times 10^{-4}$                        | $1.37 \times 10^{-4}$                             | $1.03 \times 10^{-4}$ | $3.53 \times 10^{-4}$ |
| p-Xylene                  | $2.93 \times 10^{-4}$                        | $2.91 \times 10^{-4}$                             | $2.07 \times 10^{-4}$ | $8.30 \times 10^{-4}$ |
| o-Xylene                  | $2.56 \times 10^{-4}$                        | $2.56 \times 10^{-4}$                             | $1.83 \times 10^{-4}$ | $7.22 \times 10^{-4}$ |
| Styrene                   | $1.69 \times 10^{-3}$                        | $1.68 \times 10^{-3}$                             | $1.15 \times 10^{-3}$ | $5.12 \times 10^{-3}$ |
| Children (6-12 years old) |                                              |                                                   |                       |                       |
| Male                      |                                              |                                                   |                       |                       |
| Formaldehyde              | $4.30 \times 10^{-6}$                        | $4.78 \times 10^{-6}$                             | $2.97 \times 10^{-6}$ | $1.54 \times 10^{-5}$ |
| VOCs                      |                                              |                                                   |                       |                       |
| Benzene                   | $4.18 \times 10^{-4}$                        | $4.65 \times 10^{-4}$                             | $3.00 \times 10^{-4}$ | $1.42 \times 10^{-3}$ |
| Toluene                   | $2.54 \times 10^{-2}$                        | $2.82 \times 10^{-2}$                             | $1.73 \times 10^{-2}$ | $9.16 \times 10^{-2}$ |

|                  |                       |                       |                       |                       |
|------------------|-----------------------|-----------------------|-----------------------|-----------------------|
| Ethyl Benzene    | $2.18 \times 10^{-4}$ | $2.43 \times 10^{-4}$ | $1.66 \times 10^{-4}$ | $7.01 \times 10^{-4}$ |
| <i>m</i> -Xylene | $1.86 \times 10^{-4}$ | $2.08 \times 10^{-4}$ | $1.45 \times 10^{-4}$ | $5.82 \times 10^{-4}$ |
| <i>p</i> -Xylene | $3.98 \times 10^{-4}$ | $4.44 \times 10^{-4}$ | $2.87 \times 10^{-4}$ | $1.37 \times 10^{-3}$ |
| <i>o</i> -Xylene | $3.49 \times 10^{-4}$ | $3.89 \times 10^{-4}$ | $2.53 \times 10^{-4}$ | $1.18 \times 10^{-3}$ |
| Styrene          | $2.31 \times 10^{-3}$ | $2.56 \times 10^{-3}$ | $1.58 \times 10^{-3}$ | $8.31 \times 10^{-3}$ |
| <hr/>            |                       |                       |                       |                       |
| Female           |                       |                       |                       |                       |
| Formaldehyde     | $4.48 \times 10^{-6}$ | $4.90 \times 10^{-6}$ | $3.10 \times 10^{-6}$ | $1.56 \times 10^{-5}$ |
| VOCs             |                       |                       |                       |                       |
| Benzene          | $4.35 \times 10^{-4}$ | $4.76 \times 10^{-4}$ | $3.13 \times 10^{-4}$ | $1.44 \times 10^{-3}$ |
| Toluene          | $2.64 \times 10^{-2}$ | $2.89 \times 10^{-2}$ | $1.81 \times 10^{-2}$ | $9.34 \times 10^{-2}$ |
| Ethyl Benzene    | $2.27 \times 10^{-4}$ | $2.49 \times 10^{-4}$ | $1.73 \times 10^{-4}$ | $7.08 \times 10^{-4}$ |
| <i>m</i> -Xylene | $1.94 \times 10^{-4}$ | $2.13 \times 10^{-4}$ | $1.50 \times 10^{-4}$ | $5.91 \times 10^{-4}$ |
| <i>p</i> -Xylene | $4.15 \times 10^{-4}$ | $4.55 \times 10^{-4}$ | $3.00 \times 10^{-4}$ | $1.37 \times 10^{-3}$ |
| <i>o</i> -Xylene | $3.63 \times 10^{-4}$ | $3.99 \times 10^{-4}$ | $2.64 \times 10^{-4}$ | $1.19 \times 10^{-3}$ |
| Styrene          | $2.40 \times 10^{-3}$ | $2.63 \times 10^{-3}$ | $1.65 \times 10^{-3}$ | $8.43 \times 10^{-3}$ |

## References

1. Liu, Q. Y.; Liu, Y. J.; Zhang, M. G., Personal exposure and source characteristics of carbonyl compounds and BTEXs within homes in Beijing, China. *Build Environ* **2013**, *61*, 210–216.
2. Taiwan Health Promotion Administration (HPA). Compilation of exposure factor of the general population in Taiwan. 2008. Ministry of Health and welfare. Taipei, Taiwan.
3. Taiwan Ministry of the Interior (MOI). Abridged life table in Republic of China Area, 2020. <https://www.moi.gov.tw/english/cl.aspx?n=7780>. (Accessed on 30 December 2021).
